# Supplementary material for: Multiple Rap1 effectors control Epac1-mediated tightening of endothelial junctions
Source: PubMed Central journal article supplement — Small GTPases. 2018 Feb 17;11(5):346–53. doi: 10.1080/21541248.2018.1431512 (PMC7549671; doi:10.1080/21541248.2018.1431512), 2018-02-17
Supplement: KSGT_A_1431512_SM8739.pdf [file KSGT_A_1431512_SM8739.pdf]

Supplemental figure 1

A.

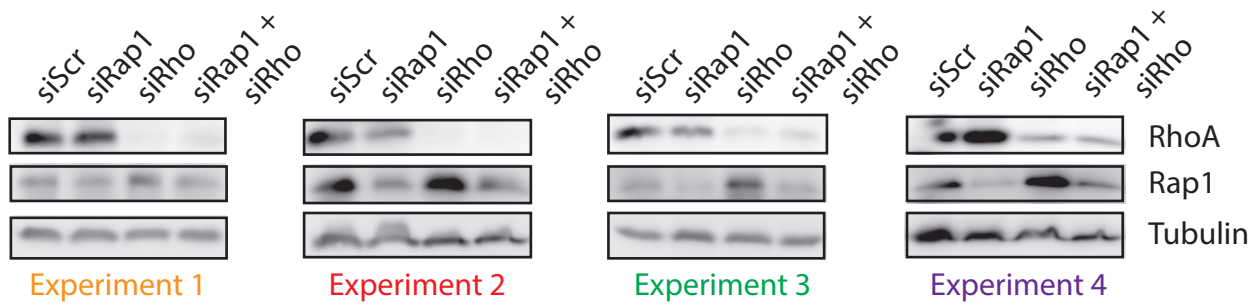

B.

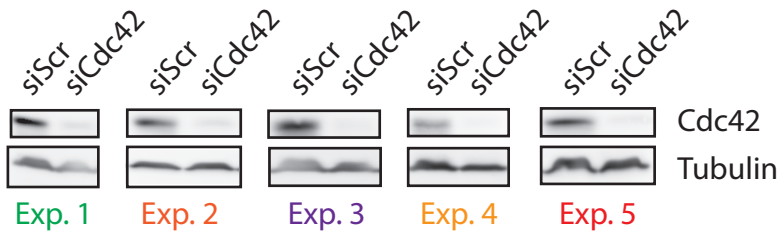

C.

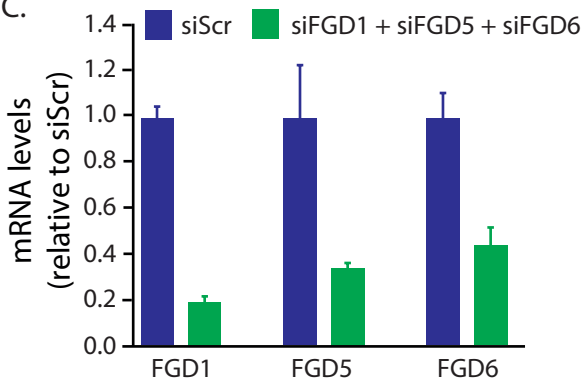

D.

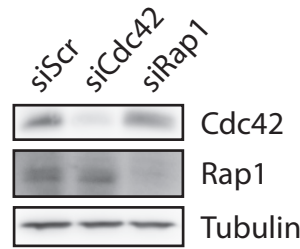

E.

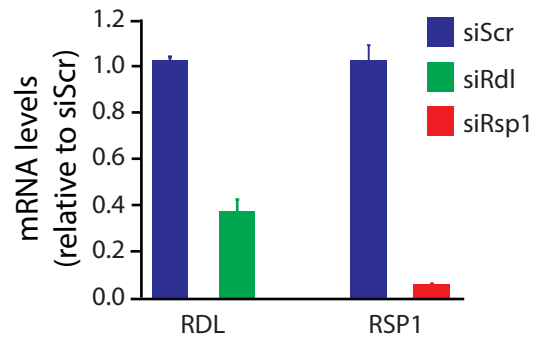

F.

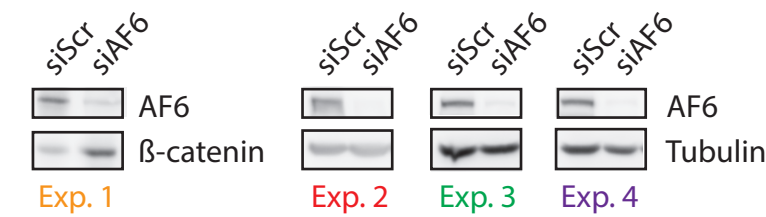

G.

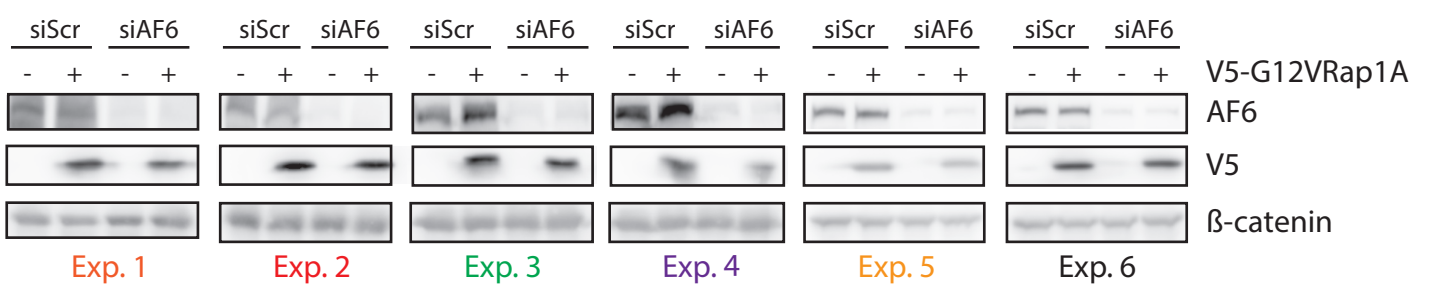

H.

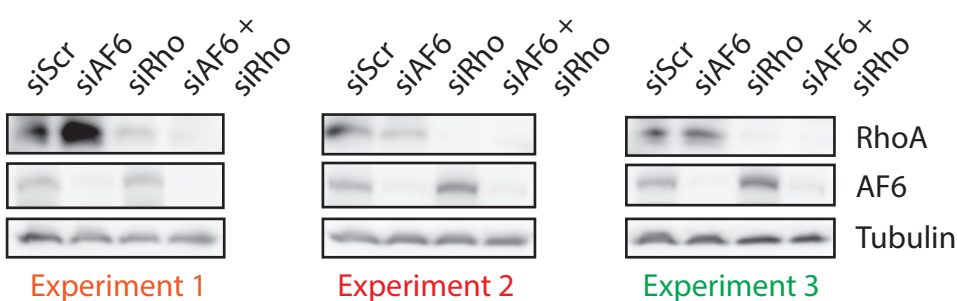

Supplemental figure 1: Knockdown and expression controls of the IF and ECIS experiments in the main figures. (A) Western blots of the experiments shown in figure 1. (B) Western blots of the experiments shown in figure 2D. (C) QPCR of the experiment shown in figure 3A. (D) Western blots of the experiment shown in figure 3B. (E) QPCR of the experiment shown in figure 4A. (F) Western blots of the experiments shown in figure 4B. (G) Western blots of the experiments shown in figure 4C. (H) Western blots of the experiments shown in figure 4D.
